# Supplementary material for: A Low-Glucose Eating Pattern Improves Biomarkers of Postmenopausal Breast Cancer Risk: An Exploratory Secondary Analysis of a Randomized Feasibility Trial
Source: MDPI journal article supplement (doi:10.3390/nu13124508), 2021-12-16
Supplement: s1 [file s1]

**Table S1.** Difference in outcomes from baseline to 16 weeks in low- and high-glucose eating patterns.

|                                | Low-Glucose Eating Pattern |      | High-Glucose Eating Pattern |      |
|--------------------------------|----------------------------|------|-----------------------------|------|
|                                | Mean Change                | SD   | Mean Change                 | SD   |
| Weight (kg)                    | -7.4                       | 3.9  | -5.8                        | 3.7  |
| Energy intake (kcal)           | -323                       | 410  | -445                        | 440  |
| Fasting glucose (mg/dl)        | -3.3                       | 10.7 | -1.5                        | 9.4  |
| Fasting insulin ( $\mu$ IU/ml) | -7.0                       | 6.4  | -3.5                        | 5.5  |
| Insulin resistance (HOMA-IR)   | -0.7                       | 0.7  | -0.2                        | 0.8  |
| MAGE (mg/dl)                   | -1.8                       | 9.4  | 2.2                         | 12.6 |
| CRP ( $\mu$ g/ml)              | -0.5                       | 1.8  | -1.4                        | 2.4  |
| Adiponectin ( $\mu$ g/ml)      | 1.8                        | 2.5  | -0.9                        | 2.9  |
| IGF-1 (nM)                     | 7.6                        | 25.3 | 12.8                        | 16.0 |
